# Supplementary material for: Metformin for the treatment of breast cancer: a scoping review of randomized clinical trials
Source: BMC Cancer. 2025 Aug 21;25:1352. doi: 10.1186/s12885-025-14468-3 (PMC12369099; doi:10.1186/s12885-025-14468-3)
Supplement: Supplementary file 5 — Supplementary Material 5. Clinical, non-clinical, and miscellaneous outcome measures examined by each study presented according to the breast cancer phenotype, stage, and treatment modality of their samples. [file 12885_2025_14468_MOESM5_ESM.xlsx]

## Sheet: CLINICAL OUTCOMES
	Overview of Studies' Outcomes according to Phenotypes, Stages of Breast Cancer, and Treatment Modalities
	Note: Legends at the bottom.										CLINICAL OUTCOMES
											SURVIVAL							RESPONSE			OTHER CLINICAL OUTCOMES			BREAST-RELATED OUTCOMES
											OS	DFS	PFS	RFS	DRFS	DMFS	Mortality	ORR	CBR	pCR	Metastasis	QoL	Toxicity	BCR	Breast density change	Breast cancer–free interval	Breast cancer events	Clinical resection of lump	Prevalence, grade and proliferation of lobular or ductal intraepithelial neoplasia and ductal hyperplasia	ECOG performance status
PHENOTYPES	Not informed		PECAM Study (Davis, 2018)
										IBIS 3 Trial (Oke, 2017)
		Meyerhardt, 2020; Brown, 2020
										SPIRIT Trial (Yeh, 2021)
									OPTIMAL Trial (NCT04001725)*								2					2								2
										Saif, 2019; Kritharis, 2014			2										2
										Sadighi, 2016													2
										TCTR20200116007*
		ChiCTR-IPR-16008553*																		1							2	2
					NeoMET Study (NCT01929811)*													2	2	1			2	2
				METNEO Trial (NCT04170465)*																2			1
		NCT04387630*																1	1
										NCT02472353*												2	2
		NCT02360059*
	Luminal								Zhao, 2017		2		1					2	2				2
				METEOR Trial (Kim, 2019)														1		2			2	2	2
						Semiglazova, 2018												2		2		2	2
		NeoMet Trial (Hadad, 2011; Hadad, 2015)
						Arce-Salinas, 2016												2	2	1
		SETUP AIM Trial (ACTRN12612000416897)*
									NCT01477060*		2		1					2					2
	HER2+	HERMET Trial (NCT03238495)*																		1
				METTEN Trial (Martin-Castillo, 2018)								2								1			2	2
	Triple-negative	BREAKFAST Trial (NCT04248998)*									2			2		2		2	2	1			2
	Mixed					Ahmed, 2021						2						2	2	1			2	2
		El-Haggar, 2016										1									2
		Ko, 2015
				Liubota, 2018							2	2						1	1	1				2
				Salah, 2021							2		2					1	1
					Barakat, 2022													1		1		2	2	2
					MBC1 Trial (Semiglazova, 2019)													1		1		2	2
		Reach for Health trial (Patterson, 2018)
				Azazy, 2020																1			2
		ChiCTR1900023487 (Zhang, 2020)*									2	2						2				2	2
		ChiCTR1900027489*										2	2										2
										MetBreCS Trial (EUCTR2015-001001-14-IT)*
									MYME Trial (Nanni, 2018)		2		1					2					2
									Pimentel, 2019		2		1						2			2	2
		SNCIC CTG MA.32 (Goodwin, 2022)									2	1			2							2			2	2
		Bonanni, 2012																											2
		IA	IB	IIA	IIB	IIIA	IIIB	IIIC	IV	Not informed
		Stage I		Stage II		Stage III			Stage IV	Stage ?
		STAGES OF BREAST CANCER
	LEGENDS
	Phenotypes			Treatment modalities				* Studies without published results		Outcomes:
	Not informed			adjuvant						1 = primary
	Luminal			neoadjuvant						2 = secondary
	HER2+			adjuvant/neoadjuvant
	Triple-negative			palliative care
	Mixed			prevention of recurrence
				unclear

## Sheet: NON-CLINICAL OUTCOMES
	Overview of Studies' Outcomes according to Phenotypes, Stages of Breast Cancer, and Treatment Modalities
	Note: Legends at the bottom.										NON-CLINICAL OUTCOMES
											COMORBIDITIES			NUTRITION		ANTHROPOMETRIC MEASUREMENTS						FERTILITY			SEX HORMONES									GENETIC				BLOODTESTS				LIVER FUNCTION		KIDNEY FUNCTION	BLOOD-BASED ENERGETIC BIOMARKERS
											Blood pressure	DM	Metabolic syndrome	Diet	Weight loss	BMI	Weight	Height	Abdominal circumference	Waist circunference	Waist to Hip Ratio	Endometrial thickness	Menstruation recovery rate	5-year pregnancy	AMH	Inhibin B	Estradiol	Progesterone	PRL	FSH	LH	Testosterone	SHBG	Genomic analysis	mTOR pathway gene expression	C Allele of ATM rs11212617	Genes associated with doxorubicin-induced cardiotoxicity at baseline	Blood routine	Urine routine	SU	Vitamin B12	AST	ALT	eGFR	Glucose	Insulin	HOMA-IR	HbA1c	IGF1R
PHENOTYPES	Not informed		PECAM Study (Davis, 2018)													2	2		2			1													1										2	2	2
										IBIS 3 Trial (Oke, 2017)
		Meyerhardt, 2020; Brown, 2020														2	2				2																								2	1
										SPIRIT Trial (Yeh, 2021)						2	2																							2				2		2		2
									OPTIMAL Trial (NCT04001725)*			2																																	1
										Saif, 2019; Kritharis, 2014
										Sadighi, 2016																																					2
										TCTR20200116007*																											2
		ChiCTR-IPR-16008553*											2																																2	2
					NeoMET Study (NCT01929811)*
				METNEO Trial (NCT04170465)*
		NCT04387630*
										NCT02472353*																								2
		NCT02360059*
	Luminal								Zhao, 2017
				METEOR Trial (Kim, 2019)
						Semiglazova, 2018
		NeoMet Trial (Hadad, 2011; Hadad, 2015)
						Arce-Salinas, 2016
		SETUP AIM Trial (ACTRN12612000416897)*
									NCT01477060*
	HER2+	HERMET Trial (NCT03238495)*
				METTEN Trial (Martin-Castillo, 2018)																																2										2
	Triple-negative	BREAKFAST Trial (NCT04248998)*
	Mixed					Ahmed, 2021
		El-Haggar, 2016																																												2	2
		Ko, 2015									2				1		2	2		2																									2	2		2
				Liubota, 2018
				Salah, 2021
					Barakat, 2022
					MBC1 Trial (Semiglazova, 2019)
		Reach for Health trial (Patterson, 2018)																													2	2	2												1	1
				Azazy, 2020
		ChiCTR1900023487 (Zhang, 2020)*																					1	2	2	2	2	2	2	2	2	2	2
		ChiCTR1900027489*																					1	2	2	2	2	2	2	2	2	2	2					2	2			2	2	2
										MetBreCS Trial (EUCTR2015-001001-14-IT)*
									MYME Trial (Nanni, 2018)																																						2		2
									Pimentel, 2019
		SNCIC CTG MA.32 (Goodwin, 2022)										2		2		2											2					2	2								2					2	2
		Bonanni, 2012														2																															2		2
		IA	IB	IIA	IIB	IIIA	IIIB	IIIC	IV	Not informed
		Stage I		Stage II		Stage III			Stage IV	Stage ?
		STAGES OF BREAST CANCER
	LEGENDS
	Phenotypes			Treatment modalities				* Studies without published results		Outcomes:
	Not informed			adjuvant						1 = primary
	Luminal			neoadjuvant						2 = secondary
	HER2+			adjuvant/neoadjuvant
	Triple-negative			palliative care
	Mixed			prevention of recurrence
				unclear
[truncated: 29 more columns]

## Sheet: MISCELLANEOUS OUTCOMES 
	Overview of Studies' Outcomes according to Phenotypes, Stages of Breast Cancer, and Treatment Modalities
	Note: Legends at the bottom.										MISCELLANEOUS OUTCOMES
																										NOT SPECIFIED
											Adiponectin	Lipid peroxidation	Leptin	Lipids profile	Aminoacid profile	Mitochondria function	Brain local control rate of disease	Neuropathy	Feasibility	DLT	PD	BDI	5 cognitive domains	Glucocorticoids-induced changes in gut microbiota populations	Metformin-induced changes in gut microbiota populations	Not specified circulating and molecular biomarkers	Not specified metabolomic analysis	Not specified gene expression profile in adipose and epithelial breast tissue	Not specified assessment of epigenetic changes in methylome patterns (DNA methylation)
PHENOTYPES	Not informed		PECAM Study (Davis, 2018)
										IBIS 3 Trial (Oke, 2017)									1
		Meyerhardt, 2020; Brown, 2020											2
										SPIRIT Trial (Yeh, 2021)
									OPTIMAL Trial (NCT04001725)*					2	2		2							2	2
										Saif, 2019; Kritharis, 2014										1	2
										Sadighi, 2016
										TCTR20200116007*						2
		ChiCTR-IPR-16008553*
					NeoMET Study (NCT01929811)*
				METNEO Trial (NCT04170465)*
		NCT04387630*
										NCT02472353*	2	2
		NCT02360059*																1
	Luminal								Zhao, 2017
				METEOR Trial (Kim, 2019)
						Semiglazova, 2018
		NeoMet Trial (Hadad, 2011; Hadad, 2015)
						Arce-Salinas, 2016
		SETUP AIM Trial (ACTRN12612000416897)*
									NCT01477060*
	HER2+	HERMET Trial (NCT03238495)*
				METTEN Trial (Martin-Castillo, 2018)
	Triple-negative	BREAKFAST Trial (NCT04248998)*
	Mixed					Ahmed, 2021
		El-Haggar, 2016
		Ko, 2015												2								2
				Liubota, 2018
				Salah, 2021
					Barakat, 2022
					MBC1 Trial (Semiglazova, 2019)
		Reach for Health trial (Patterson, 2018)																					2
				Azazy, 2020
		ChiCTR1900023487 (Zhang, 2020)*
		ChiCTR1900027489*
										MetBreCS Trial (EUCTR2015-001001-14-IT)*																2	2	2	2
									MYME Trial (Nanni, 2018)
									Pimentel, 2019
		SNCIC CTG MA.32 (Goodwin, 2022)											2
		Bonanni, 2012									2
		IA	IB	IIA	IIB	IIIA	IIIB	IIIC	IV	Not informed
		Stage I		Stage II		Stage III			Stage IV	Stage ?
		STAGES OF BREAST CANCER
	LEGENDS
	Phenotypes			Treatment modalities				* Studies without published results		Outcomes:
	Not informed			adjuvant						1 = primary
	Luminal			neoadjuvant						2 = secondary
	HER2+			adjuvant/neoadjuvant
	Triple-negative			palliative care
	Mixed			prevention of recurrence
				unclear
